# Supplementary material
Source: bioRxiv or medRxiv preprint supplement (https://medrxiv.org/highwire/filestream/85789/field_highwire_adjunct_files/0/2020.06.12.20129387-1.pdf)
Supplement: Supplementary file [file 2020.06.12.20129387-1.pdf]

**Analysis of the time evolution of SARS-CoV-2 lethality rate in Italy:  
Evidence of an unaltered virus potency**

**Nicole Balasco<sup>1</sup>, Vincenzo d'Alessandro<sup>2</sup>, Giovanni Smaldone<sup>3</sup>, Luigi Vitagliano<sup>1,\*</sup>**

<sup>1</sup>Institute of Biostructures and Bioimaging, CNR, Naples, Italy.

<sup>2</sup>Department of Electrical Engineering and Information Technology, University Federico II, Naples, Italy.

<sup>3</sup>IRCCS SDN, Naples, Italy.

\*Correspondence should be addressed to L.V. via Mezzocannone 16, 80134, Naples, Italy e-mail: luigi.vitagliano@unina.it

**Supplementary Material**

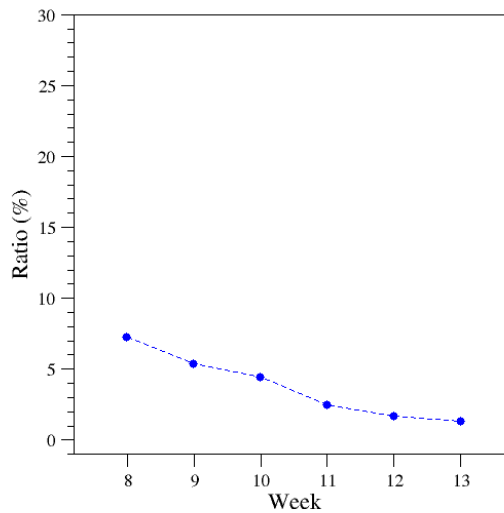

**Figure S1.** Percentage of positive tests over total tests from  $W_8$  to  $W_{13}$ . Data are counted by omitting multiple tests made on the same person. The data used to generate the graph are reported in **Table S4** (individual Cases/Tests).

**Table S1.** Cases/deaths/tests daily collected from the Reports of the Italian National Institute of Health (ISS).

| <b>Date</b> | <b>Daily Cases</b> | <b>Daily Deaths</b> | <b>Daily Tests</b> |
|-------------|--------------------|---------------------|--------------------|
| 20-Feb      | 0                  | 0                   |                    |
| 21-Feb      | 17                 | 0                   |                    |
| 22-Feb      | 47                 | 1                   |                    |
| 23-Feb      | 90                 | 2                   |                    |
| 24-Feb      | 72                 | 4                   | 4324               |
| 25-Feb      | 94                 | 4                   | 4299               |
| 26-Feb      | 147                | 1                   | 964                |
| 27-Feb      | 185                | 5                   | 2427               |
| 28-Feb      | 234                | 4                   | 3681               |
| 29-Feb      | 239                | 8                   | 2966               |
| 01-Mar      | 573                | 12                  | 2466               |
| 02-Mar      | 335                | 11                  | 2218               |
| 03-Mar      | 466                | 27                  | 2511               |
| 04-Mar      | 587                | 28                  | 3981               |
| 05-Mar      | 769                | 41                  | 2525               |
| 06-Mar      | 778                | 49                  | 3997               |
| 07-Mar      | 1247               | 36                  | 5703               |
| 08-Mar      | 1492               | 133                 | 7875               |
| 09-Mar      | 1797               | 97                  | 3889               |
| 10-Mar      | 1577               | 168                 | 6935               |
| 11-Mar      | 1713               | 196                 | 12393              |
| 12-Mar      | 2651               | 189                 | 12857              |
| 13-Mar      | 2547               | 250                 | 11477              |
| 14-Mar      | 3497               | 175                 | 11682              |
| 15-Mar      | 3590               | 368                 | 15729              |
| 16-Mar      | 3385               | 349                 | 13063              |
| 17-Mar      | 3374               | 345                 | 10695              |
| 18-Mar      | 4207               | 475                 | 16884              |
| 19-Mar      | 5322               | 427                 | 17236              |
| 20-Mar      | 5986               | 627                 | 24109              |
| 21-Mar      | 6557               | 793                 | 26336              |
| 22-Mar      | 5560               | 651                 | 25180              |
| 23-Mar      | 4790               | 601                 | 17066              |
| 24-Mar      | 5249               | 743                 | 21496              |
| 25-Mar      | 5210               | 683                 | 27481              |
| 26-Mar      | 6153               | 712                 | 36615              |
| 27-Mar      | 5909               | 919                 | 33019              |
| 28-Mar      | 5974               | 889                 | 35447              |
| 29-Mar      | 5217               | 756                 | 24504              |
| 30-Mar      | 4050               | 812                 | 23329              |
| 31-Mar      | 4053               | 837                 | 29609              |
| 01-Apr      | 4782               | 727                 | 34455              |

|        |      |     |       |
|--------|------|-----|-------|
| 02-Apr | 4668 | 760 | 39809 |
| 03-Apr | 4585 | 766 | 38617 |
| 04-Apr | 4805 | 681 | 37375 |
| 05-Apr | 4316 | 525 | 34237 |
| 06-Apr | 3599 | 636 | 30271 |
| 07-Apr | 3039 | 604 | 33713 |
| 08-Apr | 3836 | 542 | 51680 |
| 09-Apr | 4204 | 610 | 46244 |
| 10-Apr | 3951 | 570 | 53495 |
| 11-Apr | 4694 | 619 | 56609 |
| 12-Apr | 4092 | 431 | 46720 |
| 13-Apr | 3153 | 566 | 36717 |
| 14-Apr | 2972 | 602 | 26779 |
| 15-Apr | 2667 | 578 | 43715 |
| 16-Apr | 3786 | 525 | 60999 |
| 17-Apr | 3493 | 575 | 65705 |
| 18-Apr | 3491 | 482 | 61725 |
| 19-Apr | 3047 | 433 | 50708 |
| 20-Apr | 2256 | 454 | 41483 |
| 21-Apr | 2729 | 570 | 52126 |
| 22-Apr | 3370 | 401 | 63101 |
| 23-Apr | 2646 | 464 | 66658 |
| 24-Apr | 3021 | 420 | 62447 |
| 25-Apr | 2357 | 415 | 65387 |
| 26-Apr | 2324 | 260 | 49916 |
| 27-Apr | 1739 | 333 | 32003 |
| 28-Apr | 2019 | 382 | 57272 |
| 29-Apr | 2086 | 323 | 63827 |
| 30-Apr | 1872 | 285 | 68456 |
| 01-May | 1965 | 269 | 74208 |
| 02-May | 1900 | 474 | 55412 |
| 03-May | 1389 | 174 | 44935 |
| 04-May | 1221 | 195 | 37631 |
| 05-May | 1075 | 236 | 55263 |
| 06-May | 1444 | 369 | 64263 |
| 07-May | 1401 | 274 | 70359 |
| 08-May | 1327 | 243 | 63775 |
| 09-May | 1083 | 194 | 69171 |
| 10-May | 802  | 165 | 51678 |
| 11-May | 744  | 179 | 40740 |
| 12-May | 1402 | 172 | 67003 |
| 13-May | 888  | 195 | 61973 |
| 14-May | 992  | 262 | 71876 |
| 15-May | 789  | 242 | 68176 |
| 16-May | 875  | 153 | 69179 |

|        |     |     |       |
|--------|-----|-----|-------|
| 17-May | 675 | 145 | 60101 |
| 18-May | 451 | 99  | 36406 |
| 19-May | 813 | 162 | 63158 |
| 20-May | 665 | 161 | 67195 |
| 21-May | 642 | 156 | 71679 |
| 22-May | 652 | 130 | 75380 |
| 23-May | 669 | 119 | 72410 |
| 24-May | 531 | 50  | 55824 |
| 25-May | 300 | 92  | 35241 |
| 26-May | 397 | 78  | 57674 |
| 27-May | 584 | 117 | 67324 |
| 28-May | 593 | 70  | 75893 |
| 29-May | 516 | 87  | 72135 |
| 30-May | 416 | 111 | 69342 |
| 31-May | 333 | 75  | 54118 |

**Table S2.** Week definition with starting and ending date.

| <b>Week</b>     | <b>Starting Date</b> | <b>Ending Date</b> |
|-----------------|----------------------|--------------------|
| W <sub>0</sub>  | 24-Feb               | 01-Mar             |
| W <sub>1</sub>  | 02-Mar               | 08-Mar             |
| W <sub>2</sub>  | 09-Mar               | 15-Mar             |
| W <sub>3</sub>  | 16-Mar               | 22-Mar             |
| W <sub>4</sub>  | 23-Mar               | 29-Mar             |
| W <sub>5</sub>  | 30-Mar               | 05-Apr             |
| W <sub>6</sub>  | 06-Apr               | 12-Apr             |
| W <sub>7</sub>  | 13-Apr               | 19-Apr             |
| W <sub>8</sub>  | 20-Apr               | 26-Apr             |
| W <sub>9</sub>  | 27-Apr               | 03-May             |
| W <sub>10</sub> | 04-May               | 10-May             |
| W <sub>11</sub> | 11-May               | 17-May             |
| W <sub>12</sub> | 18-May               | 24-May             |
| W <sub>13</sub> | 25-May               | 31-May             |

**Table S3.** Cases and deaths *per* week. The normalization was performed by dividing the actual values by the maximum of each ensemble.

| <b>Week</b>     | <b>Average number of Cases</b> | <b>Average number of Deaths</b> | <b>Normalized number of Cases</b> | <b>Normalized number of Deaths</b> |
|-----------------|--------------------------------|---------------------------------|-----------------------------------|------------------------------------|
| W <sub>0</sub>  | 221                            | 5                               | 0.0401                            | 0.0072                             |
| W <sub>1</sub>  | 811                            | 46                              | 0.1474                            | 0.0613                             |
| W <sub>2</sub>  | 2482                           | 206                             | 0.4512                            | 0.2721                             |
| W <sub>3</sub>  | 4913                           | 524                             | 0.8932                            | 0.6915                             |
| W <sub>4</sub>  | 5500                           | 758                             | 1.0000                            | 1.0000                             |
| W <sub>5</sub>  | 4466                           | 730                             | 0.8119                            | 0.9632                             |
| W <sub>6</sub>  | 3916                           | 573                             | 0.7120                            | 0.7566                             |
| W <sub>7</sub>  | 3230                           | 537                             | 0.5872                            | 0.7092                             |
| W <sub>8</sub>  | 2672                           | 426                             | 0.4858                            | 0.5627                             |
| W <sub>9</sub>  | 1853                           | 320                             | 0.3369                            | 0.4224                             |
| W <sub>10</sub> | 1193                           | 239                             | 0.2169                            | 0.3160                             |
| W <sub>11</sub> | 909                            | 193                             | 0.1653                            | 0.2542                             |
| W <sub>12</sub> | 632                            | 125                             | 0.1149                            | 0.1654                             |
| W <sub>13</sub> | 448                            | 90                              | 0.0815                            | 0.1188                             |

**Table S4.** Cases/tests ratios and WLR values of the different shift schemes (0WS, 1WS, and 2WS). Cases/tests ratios and 0WS WLR values were calculated considering data derived from the same week. 1WS and 2WS WLR values were computed by dividing the deaths of a given week ( $W_i$ ) by the cases of one week ( $W_{i-1}$ ) or two weeks ( $W_{i-2}$ ) before, respectively. Individual cases/tests were counted by omitting multiple tests made on the same person (Data were retrieved from <https://lab.gedidigital.it/gedi-visual/2020/coronavirus-i-contagi-in-italia>).

| <b>Week</b>     | <b>Cases/Tests</b> | <b>Individual Cases/Tests</b> | <b>0WS WLR</b> | <b>1WS WLR</b> | <b>2WS WLR</b> |
|-----------------|--------------------|-------------------------------|----------------|----------------|----------------|
| W <sub>1</sub>  | 19.69              |                               | 5.73           |                |                |
| W <sub>2</sub>  | 23.17              |                               | 8.31           | 25.43          |                |
| W <sub>3</sub>  | 25.76              |                               | 10.66          | 21.11          | 64.63          |
| W <sub>4</sub>  | 19.68              |                               | 13.77          | 15.42          | 30.53          |
| W <sub>5</sub>  | 13.17              |                               | 16.34          | 13.27          | 14.85          |
| W <sub>6</sub>  | 8.60               |                               | 14.63          | 12.83          | 10.42          |
| W <sub>7</sub>  | 6.53               |                               | 16.63          | 13.72          | 12.03          |
| W <sub>8</sub>  | 4.66               | 7.23                          | 15.95          | 13.20          | 10.88          |
| W <sub>9</sub>  | 3.27               | 5.39                          | 17.27          | 11.98          | 9.91           |
| W <sub>10</sub> | 2.03               | 4.46                          | 20.06          | 12.92          | 8.96           |
| W <sub>11</sub> | 1.45               | 2.49                          | 21.18          | 16.14          | 10.39          |
| W <sub>12</sub> | 1.00               | 1.67                          | 19.83          | 13.78          | 10.50          |
| W <sub>13</sub> | 0.727              | 1.34                          | 20.07          | 14.24          | 9.90           |

**Table S5.** Ratio of cases (or deaths) between consecutive weeks. Values were computed by dividing the cases (or deaths) of a given week ( $W_i$ ) by the cases (or deaths) of one week ( $W_{i-1}$ ) before. For example, the ratio #2 is calculated by dividing the Cases (or Deaths) of  $W_2$  for those of  $W_1$ .

| <b>Ratio</b> | <b>Cases</b> | <b>Deaths</b> |
|--------------|--------------|---------------|
| 2            | 3.062        | 4.440         |
| 3            | 1.980        | 2.541         |
| 4            | 1.120        | 1.446         |
| 5            | 0.812        | 0.963         |
| 6            | 0.877        | 0.785         |
| 7            | 0.825        | 0.937         |
| 8            | 0.827        | 0.793         |
| 9            | 0.693        | 0.751         |
| 10           | 0.644        | 0.748         |
| 11           | 0.762        | 0.804         |
| 12           | 0.695        | 0.651         |
| 13           | 0.710        | 0.718         |
